# Supplementary material
Source: publisher figshare collection journal article supplement (https://asha.figshare.com/articles/dataset/_/19310822)
Supplement: Supplementary file 1 [file 1]

**Supplemental Material S1.** Baseline characteristics of the group of participating VPT children and the group of nonparticipating VPT children in baseline assessment at age 2 years CA.

| <b>Characteristic</b>                                       | <b>Participating group<br/>(<i>n</i> = 84)</b> | <b>Nonparticipating group<br/>(<i>n</i> = 41)</b> | <b><i>p</i> value</b> |
|-------------------------------------------------------------|------------------------------------------------|---------------------------------------------------|-----------------------|
| Birth weight, g, mean ( <i>SD</i> )                         | 1173 (392)                                     | 1186 (370)                                        | .862                  |
| Gestational age, wk, mean ( <i>SD</i> )                     | 29.0 (2.0)                                     | 29.2 (2.0)                                        | .521                  |
| Small for gestational age (< 10th percentile), <i>n</i> (%) | 8 (10)                                         | 5 (12)                                            | .646                  |
| Male sex, <i>n</i> (%)                                      | 51 (61)                                        | 22 (54)                                           | .452                  |
| Abnormal neonatal hearing screening, <i>n</i> (%)           | 4 (5)                                          | 0 (0)                                             | .302                  |
| Neighbourhood socioeconomic status, mean ( <i>SD</i> )      | 0.01 (1.20)                                    | 0.04 (0.99)                                       | .870                  |
