# Supplementary material
Source: publisher figshare collection journal article supplement (https://asha.figshare.com/articles/dataset/_/19310822)
Supplement: Supplementary file 2 [file 1]

**Supplemental Material S2.** Baseline characteristics of the group of participating VPT children and the group of nonparticipating VPT children in follow up assessment at age 4 years.

| Characteristic                                              | Participating group ( <i>n</i> = 63) | Nonparticipating group ( <i>n</i> = 21) | <i>p</i> value |
|-------------------------------------------------------------|--------------------------------------|-----------------------------------------|----------------|
| GA in weeks, mean ( <i>SD</i> )                             | 28.8 (2.0)                           | 29.3 (2.1)                              | .332           |
| BW in grams, mean ( <i>SD</i> )                             | 1135 (381)                           | 1287 (412)                              | .126           |
| Small for gestational age (< 10th percentile), <i>n</i> (%) | 7 (11)                               | 1 (5)                                   | .673*          |
| Male sex, <i>n</i> (%)                                      | 41 (65)                              | 10 (48)                                 | .156           |
| Abnormal neonatal hearing screening, <i>n</i> (%)           | 4 (6)                                | 0 (0)                                   | .568*          |
| Neighborhood socioeconomic status, mean ( <i>SD</i> )       | 0.028 (1.298)                        | -0.047 (0.870)                          | .807           |

*Note.* *p* values were calculated with independent samples Student's *t*-test, Pearson's chi-square test (or Fisher's exact test\*; in case of expected cell frequencies < 5).
